# Supplementary material for: Expression patterns of flowering genes in leaves of ‘Pineapple’ sweet orange [Citrus sinensis (L.) Osbeck] and pummelo (Citrus grandis Osbeck)
Source: PubMed Central journal article supplement (PMC5577756; doi:10.1186/s12870-017-1094-3), 2017-08-30

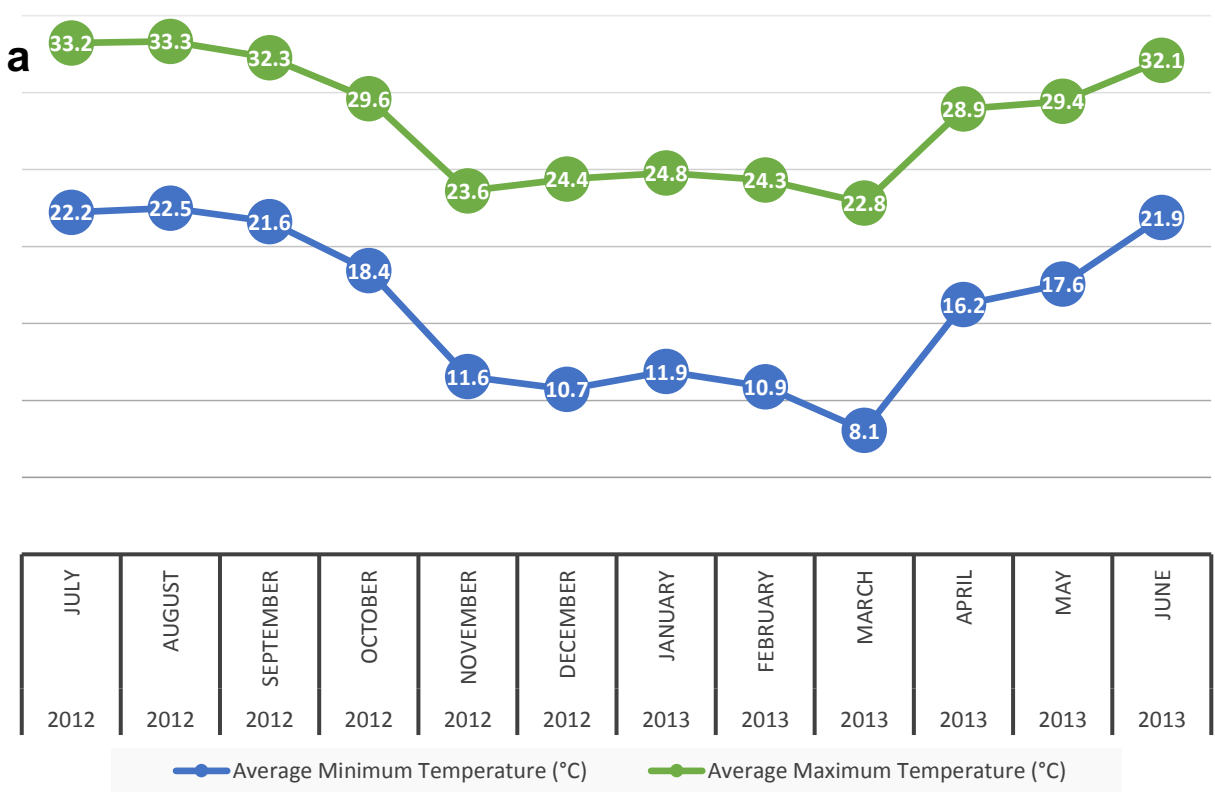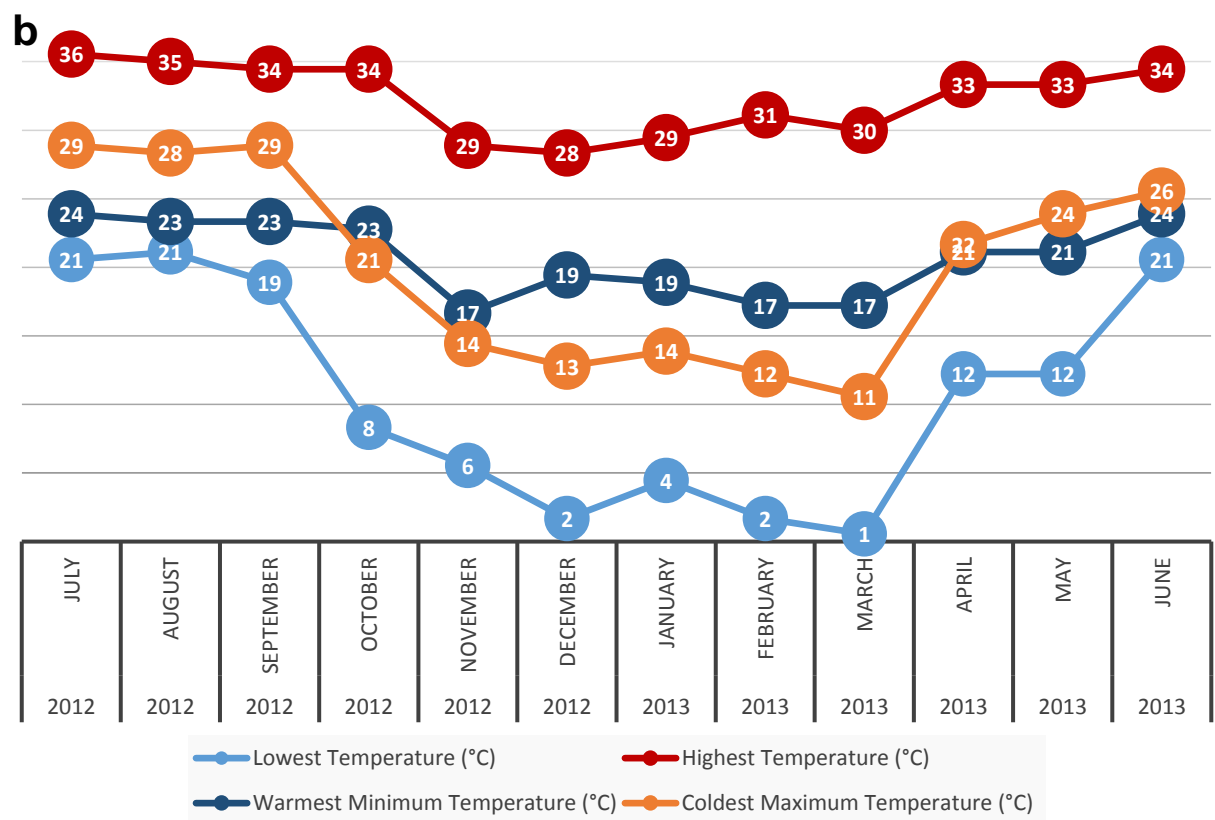

Supplement: 12870_2017_1094_MOESM1_ESM.pdf [file 12870_2017_1094_MOESM1_ESM.pdf]
