# Supplementary material for: Expression patterns of flowering genes in leaves of ‘Pineapple’ sweet orange [Citrus sinensis (L.) Osbeck] and pummelo (Citrus grandis Osbeck)
Source: PubMed Central journal article supplement (PMC5577756; doi:10.1186/s12870-017-1094-3), 2017-08-30
Supplement: 12870_2017_1094_MOESM2_ESM.pdf [file 12870_2017_1094_MOESM2_ESM.pdf]

**Table S1. TaqMan MGB primers and probes.**

| <b>Target</b>                                                                         | <b>Sequence (5' to 3')</b>                                                                                     |
|---------------------------------------------------------------------------------------|----------------------------------------------------------------------------------------------------------------|
| <b>5.8S rRNA</b><br>( <i>C. sinensis</i> JN681150.1;<br><i>C. grandis</i> JN681156.1) | Forward CGACTCTCGGCAACGGATA<br>Reverse CGCATTTTCGCTACGTTCTTCA<br>Probe CTCGGCTCTCGCATC                         |
| <b>CiFT1</b><br>(Nishikawa et al. 2007)                                               | Forward CTACCAACAAAATTTTCATCACTTGAATAG<br>Reverse GATCTCTCTCCCTGCTAGACATATCA<br>Probe TCTTACTACTTTTGTAGGCTGTGT |
| <b>CiFT2</b><br>(Nishikawa et al. 2007)                                               | Forward CTACCAACAAAATTTTCATCACTTGAATAG<br>Reverse GGGTCTCTCTCCCTGCTAGACA<br>Probe TCTTACTACTTTTGTAGGTTGTTTG    |
| <b>CiFT3</b><br>(Nishikawa et al. 2007)                                               | Forward CAACAAAATTTTCATCACTTGAATAGTC<br>Reverse AAACACTCAACAACACTTAGCACAAA<br>Probe AGGCTGTGTGTGCGTGTA         |
