# Supplementary material for: Expression patterns of flowering genes in leaves of ‘Pineapple’ sweet orange [Citrus sinensis (L.) Osbeck] and pummelo (Citrus grandis Osbeck)
Source: PubMed Central journal article supplement (PMC5577756; doi:10.1186/s12870-017-1094-3), 2017-08-30
Supplement: 12870_2017_1094_MOESM3_ESM.pdf [file 12870_2017_1094_MOESM3_ESM.pdf]

**Table S2. Full Student's t test results**

Pummelo (15 y.o.)

| Date      | Letters | Least Sq Mean FT1 | Std Error |
|-----------|---------|-------------------|-----------|
| 3-Jul-12  | B       | 0.88              | 1.43      |
| 1-Aug-12  | B       | 0.61              | 1.43      |
| 26-Sep-12 | B       | 0.39              | 1.43      |
| 29-Oct-12 | B       | 0.75              | 1.43      |
| 29-Nov-12 | B       | 0.47              | 1.43      |
| 8-Jan-13  | B       | 0.74              | 1.43      |
| 29-Jan-13 | B       | 0.39              | 1.43      |
| 26-Feb-13 | B       | 0.28              | 1.43      |
| 26-Mar-13 | B       | 3.62              | 1.43      |
| 30-Apr-13 | A       | 12.45             | 1.43      |
| 30-May-13 | B       | 3.01              | 1.43      |
| 28-Jun-13 | B       | 3.80              | 1.43      |

| Date      | Letters | Least Sq Mean FT2 | Std Error |
|-----------|---------|-------------------|-----------|
| 3-Jul-12  | B       | 0.68              | 2.47      |
| 1-Aug-12  | B       | 0.77              | 2.47      |
| 26-Sep-12 | B       | 0.62              | 2.47      |
| 29-Oct-12 | B       | 0.39              | 2.47      |
| 29-Nov-12 | B       | 0.60              | 2.47      |
| 8-Jan-13  | B       | 0.32              | 2.47      |
| 29-Jan-13 | B       | 0.45              | 2.47      |
| 26-Feb-13 | B       | 0.11              | 2.47      |
| 26-Mar-13 | B       | 6.72              | 2.47      |
| 30-Apr-13 | A       | 21.61             | 2.47      |
| 30-May-13 | B       | 3.99              | 2.47      |
| 28-Jun-13 | B       | 5.21              | 2.47      |

| Date      | Letters | Least Sq Mean FT3 | Std Error |
|-----------|---------|-------------------|-----------|
| 3-Jul-12  | B       | 0.98              | 0.99      |
| 1-Aug-12  | B       | 0.56              | 0.99      |
| 26-Sep-12 | B       | 0.28              | 0.99      |
| 29-Oct-12 | B       | 0.82              | 0.99      |
| 29-Nov-12 | B       | 0.34              | 0.99      |
| 8-Jan-13  | B       | 0.95              | 0.99      |
| 29-Jan-13 | B       | 0.33              | 0.99      |
| 26-Feb-13 | B       | 0.35              | 0.99      |
| 26-Mar-13 | B       | 1.94              | 0.99      |
| 30-Apr-13 | A       | 7.35              | 0.99      |
| 30-May-13 | B       | 2.10              | 0.99      |
| 28-Jun-13 | B       | 2.87              | 0.99      |

'Pineapple' Sweet Orange (15 y.o.)

| Date      | Letters | Least Sq Mean FT1 | Std Error |
|-----------|---------|-------------------|-----------|
| 3-Jul-12  | B       | 2.00              | 0.42      |
| 1-Aug-12  | CD      | 0.53              | 0.42      |
| 26-Sep-12 | D       | 0.02              | 0.42      |
| 29-Oct-12 | CD      | 0.22              | 0.42      |
| 29-Nov-12 | CD      | 0.46              | 0.42      |
| 8-Jan-13  | CD      | 0.07              | 0.46      |
| 29-Jan-13 | CD      | 0.32              | 0.42      |
| 26-Feb-13 | CD      | 0.39              | 0.46      |
| 26-Mar-13 | CD      | 0.31              | 0.46      |
| 30-Apr-13 | A       | 4.06              | 0.42      |
| 30-May-13 | B       | 2.51              | 0.42      |
| 28-Jun-13 | BC      | 1.32              | 0.46      |

| Date      | Letters | Least Sq Mean FT2 | Std Error |
|-----------|---------|-------------------|-----------|
| 3-Jul-12  | AB      | 2.52              | 0.42      |
| 1-Aug-12  | D       | 0.46              | 0.42      |
| 26-Sep-12 | D       | 0.08              | 0.42      |
| 29-Oct-12 | D       | 0.22              | 0.42      |
| 29-Nov-12 | D       | 0.05              | 0.42      |
| 8-Jan-13  | D       | 0.01              | 0.46      |
| 29-Jan-13 | D       | 0.14              | 0.42      |
| 26-Feb-13 | BC      | 1.76              | 0.42      |
| 26-Mar-13 | CD      | 0.55              | 0.46      |
| 30-Apr-13 | A       | 3.64              | 0.46      |
| 30-May-13 | B       | 2.22              | 0.42      |
| 28-Jun-13 | AB      | 2.68              | 0.46      |

| Date      | Letters | Least Sq Mean FT3 | Std Error |
|-----------|---------|-------------------|-----------|
| 3-Jul-12  | CD      | 1.12              | 0.90      |
| 1-Aug-12  | CD      | 0.79              | 0.99      |
| 26-Sep-12 | D       | 0.06              | 0.99      |
| 29-Oct-12 | CD      | 1.27              | 0.90      |
| 29-Nov-12 | BC      | 2.89              | 0.90      |
| 8-Jan-13  | CD      | 0.67              | 0.90      |
| 29-Jan-13 | CD      | 1.18              | 0.90      |
| 26-Feb-13 | CD      | 0.36              | 0.90      |
| 26-Mar-13 | CD      | 1.15              | 0.90      |
| 30-Apr-13 | A       | 8.55              | 0.90      |
| 30-May-13 | B       | 4.45              | 0.90      |
| 28-Jun-13 | CD      | 0.81              | 0.90      |

**'Pineapple' Sweet Orange (2 y.o.)**

| <b>Date</b> | <b>Letters</b> | <b>Least Sq Mean FT1</b> | <b>Std Error</b> |
|-------------|----------------|--------------------------|------------------|
| 3-Jul-12    | C              | 0.13                     | 0.88             |
| 1-Aug-12    | C              | 0.51                     | 0.88             |
| 26-Sep-12   | C              | 0.11                     | 0.88             |
| 29-Oct-12   | C              | 0.11                     | 0.88             |
| 29-Nov-12   | C              | 0.16                     | 0.88             |
| 8-Jan-13    | C              | 0.04                     | 0.88             |
| 29-Jan-13   | C              | 0.32                     | 0.88             |
| 26-Feb-13   | C              | 1.00                     | 0.88             |
| 26-Mar-13   | B              | 3.65                     | 0.88             |
| 30-Apr-13   | BC             | 2.25                     | 0.88             |
| 30-May-13   | C              | 0.94                     | 0.88             |
| 28-Jun-13   | A              | 6.80                     | 1.07             |

| <b>Date</b> | <b>Letters</b> | <b>Least Sq Mean FT2</b> | <b>Std Error</b> |
|-------------|----------------|--------------------------|------------------|
| 3-Jul-12    | D              | 0.21                     | 1.01             |
| 1-Aug-12    | BCD            | 1.20                     | 0.83             |
| 26-Sep-12   | D              | 0.21                     | 0.83             |
| 29-Oct-12   | D              | 0.01                     | 0.83             |
| 29-Nov-12   | D              | 0.28                     | 0.83             |
| 8-Jan-13    | D              | 0.05                     | 0.83             |
| 29-Jan-13   | CD             | 0.90                     | 0.83             |
| 26-Feb-13   | BC             | 3.09                     | 0.83             |
| 26-Mar-13   | BCD            | 1.45                     | 0.83             |
| 30-Apr-13   | D              | 0.60                     | 0.83             |
| 30-May-13   | B              | 3.57                     | 0.83             |
| 28-Jun-13   | A              | 13.09                    | 1.01             |

| <b>Date</b> | <b>Letters</b> | <b>Least Sq Mean FT3</b> | <b>Std Error</b> |
|-------------|----------------|--------------------------|------------------|
| 3-Jul-12    | C              | 0.23                     | 1.18             |
| 1-Aug-12    | BC             | 0.77                     | 1.18             |
| 26-Sep-12   | C              | 0.08                     | 1.18             |
| 29-Oct-12   | BC             | 0.75                     | 1.18             |
| 29-Nov-12   | BC             | 1.17                     | 1.18             |
| 8-Jan-13    | BC             | 0.35                     | 1.45             |
| 29-Jan-13   | BC             | 0.56                     | 1.18             |
| 26-Feb-13   | BC             | 1.47                     | 1.18             |
| 26-Mar-13   | B              | 4.17                     | 1.45             |
| 30-Apr-13   | A              | 11.01                    | 1.18             |
| 30-May-13   | BC             | 0.78                     | 1.18             |
| 28-Jun-13   | A              | 10.10                    | 1.18             |

Levels not connected by the same letter are significantly different.
